# Supplementary material for: Invasive Fungal Infections: The Early Killer after Liver Transplantation
Source: MDPI journal article supplement (doi:10.3390/jof9060655), 2023-06-12
Supplement: s1 [file s1]

## **Supplementary material**

### **Contents:**

**Supplementary Table S1.** STROBE Statement - Checklist of items that should be included in reports of cohort studies

**Supplementary Table S2.** Characteristics of patients with procedure-related deaths ( $n = 4$ ).

### **Procedure-Attributed Mortality**

**Supplementary Table S3.** Risk factors for mortality within 90 days from liver transplantation: univariate cox regression analyses ( $n = 214$ )

**Supplementary Table S4.** Risk factors for mortality within 90 days from liver transplantation: multivariate analysis with sepsis ( $n = 214$ )

**Supplementary Table S1.** STROBE Statement - Checklist of items that should be included in reports of cohort studies

| No.                       | Item                         | Recommendation                                                                                                                                                                                                                                                                                                         | Page                      |
|---------------------------|------------------------------|------------------------------------------------------------------------------------------------------------------------------------------------------------------------------------------------------------------------------------------------------------------------------------------------------------------------|---------------------------|
| <b>Title and abstract</b> |                              |                                                                                                                                                                                                                                                                                                                        |                           |
| 1                         |                              | (a) Indicate the study's design with a commonly used term in the title or the abstract<br>(b) Provide in the abstract an informative and balanced summary of what was done and what was found                                                                                                                          | 1<br>1                    |
| <b>Introduction</b>       |                              |                                                                                                                                                                                                                                                                                                                        |                           |
| 2                         | Background/rationale         | Explain the scientific background and rationale for the investigation being reported                                                                                                                                                                                                                                   | 1-2                       |
| 3                         | Objectives                   | State specific objectives, including any prespecified hypotheses                                                                                                                                                                                                                                                       | 2-3                       |
| <b>Methods</b>            |                              |                                                                                                                                                                                                                                                                                                                        |                           |
| 4                         | Study design                 | Present key elements of study design early in the paper                                                                                                                                                                                                                                                                | 2-5                       |
| 5                         | Setting                      | Describe the setting, locations, and relevant dates, including periods of recruitment, exposure, follow-up, and data collection                                                                                                                                                                                        | 2-5                       |
| 6                         | Participants                 | (a) Give the eligibility criteria, and the sources and methods of selection of participants.<br>Describe methods of follow-up                                                                                                                                                                                          | 2-5                       |
| 7                         | Variables                    | (b) For matched studies, give matching criteria and number of exposed and unexposed<br>Clearly define all outcomes, exposures, predictors, potential confounders, and effect modifiers. Give diagnostic criteria, if applicable                                                                                        | 2-5                       |
| 8*                        | Data sources/<br>measurement | For each variable of interest, give sources of data and details of methods of assessment (measurement). Describe comparability of assessment methods if there is more than one group                                                                                                                                   | 2-5                       |
| 9                         | Bias                         | Describe any efforts to address potential sources of bias                                                                                                                                                                                                                                                              | 2-5                       |
| 10                        | Study size                   | Explain how the study size was arrived at                                                                                                                                                                                                                                                                              | -                         |
| 11                        | Quantitative variables       | Explain how quantitative variables were handled in the analyses. If applicable, describe which groupings were chosen and why                                                                                                                                                                                           | -                         |
| 12                        |                              | (a) Describe all statistical methods, including those used to control for confounding<br>(b) Describe any methods used to examine subgroups and interactions<br>(c) Explain how missing data were addressed<br>(d) If applicable, explain how loss to follow-up was addressed<br>(e) Describe any sensitivity analyses | 4-5<br>4-5<br>-<br>-<br>- |
| <b>Results</b>            |                              |                                                                                                                                                                                                                                                                                                                        |                           |
| 13*                       | Participants                 | (a) Report numbers of individuals at each stage of study—eg numbers potentially eligible, examined for eligibility, confirmed eligible, included in the study, completing follow-up, and analysed<br>(b) Give reasons for non-participation at each stage<br>(c) Consider use of a flow diagram                        | 5-6<br>5-6<br>5-6         |
| 14*                       | Descriptive data             | (a) Give characteristics of study participants (eg demographic, clinical, social) and information on exposures and potential confounders<br>(b) Indicate number of participants with missing data for each variable of interest<br>(c) Summarise follow-up time (eg, average and total amount)                         | 5-7<br>-<br>2-5           |
| 15*                       | Outcome data                 | Report numbers of outcome events or summary measures over time<br>(a) Give unadjusted estimates and, if applicable, confounder-adjusted estimates and their precision (eg, 95% confidence interval). Make clear which confounders were adjusted for and why they were included                                         | 2-5                       |
| 16                        | Main results                 | (b) Report category boundaries when continuous variables were categorized<br>(c) If relevant, consider translating estimates of relative risk into absolute risk for a meaningful time period                                                                                                                          | 5-11<br>5-11              |
| 17                        | Other analyses               | Report other analyses done—eg analyses of subgroups and interactions, and sensitivity analyses                                                                                                                                                                                                                         | 9-11                      |
| <b>Discussion</b>         |                              |                                                                                                                                                                                                                                                                                                                        |                           |
| 18                        | Key results                  | Summarise key results with reference to study objectives                                                                                                                                                                                                                                                               | 12                        |

|                          |                  |                                                                                                                                                                            |       |
|--------------------------|------------------|----------------------------------------------------------------------------------------------------------------------------------------------------------------------------|-------|
| 19                       | Limitations      | Discuss limitations of the study, taking into account sources of potential bias or imprecision.<br>Discuss both direction and magnitude of any potential bias              | 15    |
| 20                       | Interpretation   | Give a cautious overall interpretation of results considering objectives, limitations, multiplicity of analyses, results from similar studies, and other relevant evidence | 12-16 |
| 21                       | Generalisability | Discuss the generalisability (external validity) of the study results                                                                                                      | 12-16 |
| <b>Other information</b> |                  |                                                                                                                                                                            |       |
| 22                       | Funding          | Give the source of funding and the role of the funders for the present study and, if applicable, for the original study on which the present article is based              | 16    |

\*Give information separately for exposed and unexposed groups.

**Supplementary Table S2.** Characteristics of patients with procedure-related deaths (n = 4).

| Sex | Age | BMI  | Indication      | Risk factors                                                                                                       | MELD | Urgency | Day of death | Cause of Death          | Complications              | Comment                                                                                                                                                                                                                             |
|-----|-----|------|-----------------|--------------------------------------------------------------------------------------------------------------------|------|---------|--------------|-------------------------|----------------------------|-------------------------------------------------------------------------------------------------------------------------------------------------------------------------------------------------------------------------------------|
| f   | 64  | 18.0 | ALF (HHV-6)     | HE III/IV°, INR >3.5, bilirubin >300 mmol/l                                                                        | 33   | HU      | 1            | Circulatory failure     | -                          | CPR during hepatectomy (ROSC after 1 minute), circulatory failure during ischemia-reperfusion-syndrome with <i>mors in tabula</i>                                                                                                   |
| m   | 63  | 32.9 | Tumor (HCC)     | Preexisting thromboembolic history (DVT/PE), metabolic syndrome (hypertension, obesity, dyslipidemia, NIDDM, COPD) | 8    | T       | 3            | Hepatic necrosis        | Hemorrhage, ACS, AKI       | PV reconstruction by interpositional EIV graft replacement, frustrane anastomosis to the SMV, perihepatic packing and external biliary drainage, early repacking (POD 1), unpacking and duct-to-duct biliary reconstruction (POD 2) |
| m   | 69  | 22.0 | Metabolic (AAT) | Preexisting coagulation disorder (prothrombin mutation)                                                            | 12   | T       | 2            | Hepatic necrosis        | Hemorrhage, early HAT, AKI |                                                                                                                                                                                                                                     |
| f   | 69  | 25.4 | Tumor (HCC)     | Donor-related risk factors: HAV accessory left hepatic artery from the LGA, Michel's type V                        | 7    | T       | 226          | Ischemic Cholangiopathy | Early HAT (POD 22), AKI    | End-to-end anastomosis of the recipient CHA and graft trunk, OLT duration 376 minutes, anastomosis duration: 38 min., anticoagulation with UFH for 24 hours.                                                                        |

Abbreviations: BMI: body mass index; f: female; m: male; ALF: acute liver failure; HHV-6: human herpesvirus-6; HCC: hepatocellular carcinoma; INR: international normalized ratio; AAT: alpha-1 antitrypsin deficiency; HE: hepatic encephalopathy; HAV: hepatic artery variant; LGA: left gastric artery; DVT: deep vein thrombosis; PE: pulmonary embolism; COPD: chronic obstructive pulmonary disease; PVT: portal vein thrombosis; HU: high-urgency; T: transplantable; HAT: hepatic artery thrombosis; ACS: abdominal compartment syndrome; AKI: acute kidney injury; CPR: cardiopulmonary resuscitation; ROSC: return of spontaneous circulation; CHA: common hepatic artery; PV: portal vein; EIV: external iliac vein; SMV: superior mesenteric vein; UFH: unfractionated heparin; POD: postoperative day; NIDDM: non-insulin dependent diabetes mellitus.

## Procedure-Attributed Mortality

In total 4 patients died due to procedure-related complications. The first patient died due to a circulatory decompensation during the reperfusion period in the context of a preceding human herpesvirus-6 associated acute liver failure, which was postoperatively confirmed by PCR in the biopsy material of the explanted liver. The second and third patient died as a consequence of a preexisting postoperative portal vein thrombosis (PVT) with a complex surgical course and finally, one due to an early HAT, Supplementary Table 2. Moreover, one of these patients developed a late graft-failure (more than 90 days after OLT) due to an early HAT, which was diagnosed in computed tomographic arteriography (elevated transaminases, 22<sup>nd</sup> day after OLT). The patient was listed for re-transplantation 75 days after OLT, but deceased on the waiting list on the 226<sup>th</sup> day after OLT. All procedural complications were related to known perioperative risk factors.

Most of the procedure-related deaths were associated with vascular complications, due to complex surgical techniques in patients with preexisting PVT or vascular variations with perioperative massive transfusion. Most of them coincided with recipient-related risk factors (e.g., metabolic syndrome, a history of thromboembolic events, thrombophilia, etc.).

Preexisting PVT is a common problem in patients with cirrhosis, with the need for complex clot removal or vascular reconstructions, having negative impact on early postoperative patient and graft survival [1-4]. Likewise, the occurrence of an early HAT can be associated with a higher rate of mortality and graft lost [5]. In our cohort, we found an early HAT incidence of 3.3%, which is comparable to the published data [6]. Most of these patients (71%) could be re-transplanted (60% of these successfully), while one patient was successfully treated by percutaneous transluminal angioplasty. Consistent with previously reported evidence, the 90-day mortality of early HAT was 29%, despite the performed treatments [6].

The majority of early deaths were associated with a coincidence of multiple postoperative complications including presence of acute kidney injury (44%). Acute kidney injury is a common postoperative OLT complication with documented influence on long-term morbidity and with rates exceeding 50% [7,8].

### References:

1. Rana, A.; Hardy, M.A.; Halazun, K.J.; Woodland, D.C.; Ratner, L.E.; Samstein, B.; Guarrera, J.V.; Brown, R.S.; Emond, J.C. Survival Outcomes Following Liver Transplantation (SOFT) Score: A Novel Method to Predict Patient Survival following Liver Transplantation. *Am. J. Transpl.* **2008**, *8*, 2537–2546. <https://doi.org/10.1111/J.1600-6143.2008.02400.X>.
2. Ponziani, F.R.; Zocco, M.A.; Senzolo, M.; Pompili, M.; Gasbarrini, A.; Avolio, A.W. Portal Vein Thrombosis and Liver Transplantation: Implications for Waiting List Period, Surgical Approach, Early and Late Follow-Up. *Transpl. Rev.* **2014**, *28*, 92–101. <https://doi.org/10.1016/J.TRRE.2014.01.003>.
3. Zanetto, A.; Rodriguez-Kastro, K.I.; Germani, G.; Ferrarese, A.; Cillo, U.; Burra, P.; Senzolo, M. Mortality in Liver Transplant Recipients with Portal Vein Thrombosis—An Updated Meta-Analysis. *Transpl. Int.* **2018**, *31*, 1318–1329. <https://doi.org/10.1111/TRI.13353>.
4. Ghabril, M.; Agarwal, S.; Lacerda, M.; Chalasani, N.; Kwo, P.; Joseph Tector, A. Portal Vein Thrombosis Is a Risk Factor for Poor Early Outcomes after Liver Transplantation: Analysis of Risk Factors and Outcomes for Portal Vein Thrombosis in Waitlisted Patients. *Transplantation* **2016**, *100*, 126–133. <https://doi.org/10.1097/TP.0000000000000785>.
5. Valente, J.F.; Alonso, M.H.; Weber, F.L.; Hanto, D.W. Late Hepatic Artery Thrombosis in Liver Allograft Recipients Is Associated with Intrahepatic Biliary Necrosis. *Transplantation* **1996**, *61*, 61–65. <https://doi.org/10.1097/00007890-199601150-00013>.
6. Bekker, J.; Ploem, S.; De Jong, K.P. Early Hepatic Artery Thrombosis after Liver Transplantation: A Systematic Review of the Incidence, Outcome and Risk Factors. *Am. J. Transpl.* **2009**, *9*, 746–757. <https://doi.org/10.1111/J.1600-6143.2008.02541.X>.
7. Hilmi, I.A.; Damian, D.; Al-Khafaji, A.; Planinsic, R.; Boucek, C.; Sakai, T.; Chang, C.C.H.; Kellum, J.A. Acute Kidney Injury Following Orthotopic Liver Transplantation: Incidence, Risk Factors, and Effects on Patient and Graft Outcomes. *Br. J. Anaesth.* **2015**, *114*, 919–926. <https://doi.org/10.1093/BJA/AEU556>.
8. Durand, F.; Francoz, C.; Asrani, S.K.; Khemichian, S.; Pham, T.A.; Sung, R.S.; Genyk, Y.S.; Nadim, M.K. Acute Kidney Injury after Liver Transplantation. *Transplantation* **2018**, *102*, 1636–1649. <https://doi.org/10.1097/TP.0000000000002305>.

**Supplementary Table S3.** Risk factors for mortality within 90 days from liver transplantation: univariate cox regression analyses ( $n = 214$ )

| Nondependent variable                                                       | B-coefficient | P-value | HR    | 95% confidence interval |       |
|-----------------------------------------------------------------------------|---------------|---------|-------|-------------------------|-------|
|                                                                             |               |         |       | lower                   | upper |
| Age (years)                                                                 | -0.010        | 0.610   | 0.99  | 0.95                    | 1.03  |
| Sex (male)                                                                  | 0.576         | 0.256   | 1.78  | 0.66                    | 4.81  |
| Height (cm)                                                                 | -0.038        | 0.190   | 0.96  | 0.91                    | 1.02  |
| Weight (kg)                                                                 | -0.025        | 0.113   | 0.98  | 0.95                    | 1.01  |
| Body mass index (kg/m2)                                                     | -0.062        | 0.243   | 0.94  | 0.85                    | 1.04  |
| SAPS III score                                                              | 0.038         | 0.237   | 1.04  | 0.98                    | 1.11  |
| MELD score                                                                  | 0.032         | 0.243   | 1.03  | 0.98                    | 1.09  |
| Charlson comorbidity index                                                  | 0.127         | 0.224   | 1.14  | 0.93                    | 1.39  |
| Intensive care length of stay (days)                                        | 0.011         | 0.307   | 1.01  | 0.99                    | 1.03  |
| Cold ischemia time (minutes)                                                | 0.001         | 0.335   | 1.00  | 1.00                    | 1.00  |
| Warm ischemia time (minutes)                                                | 0.933         | 0.371   | 1.00  | 1.00                    | 1.01  |
| Surgery duration (minutes)                                                  | 0.001         | 0.114   | 1.00  | 1.00                    | 1.00  |
| Metra time                                                                  | 0.001         | 0.141   | 1.00  | 1.00                    | 1.00  |
| Invasive fungal infection                                                   | 2.157         | <0.001  | 8.64  | 3.33                    | 22.43 |
| Breakthrough IFI                                                            | 1.803         | 0.002   | 6.07  | 1.98                    | 18.65 |
| Transplantation year                                                        | 0.054         | 0.806   | 1.06  | 0.69                    | 1.63  |
| Weekend                                                                     | -0.032        | 0.953   | 0.97  | 0.34                    | 2.75  |
| Weekday                                                                     | 0.074         | 0.544   | 1.08  | 0.85                    | 1.37  |
| Age gap between donor and recipient (years)                                 | -0.016        | 0.229   | 0.98  | 0.96                    | 1.01  |
| Age gap (10 years)                                                          | 0.785         | 0.170   | 2.19  | 0.72                    | 6.72  |
| Age gap (20 years)                                                          | -0.421        | 0.508   | 0.66  | 0.19                    | 2.28  |
| <b>Underlying disease malignancy and other tumours (reference category)</b> |               |         |       |                         |       |
| Alcoholic liver disease                                                     | -0.386        | 0.645   | 0.68  | 0.13                    | 3.51  |
| Virus related                                                               | -             | -       | -     | -                       | -     |
| Non-alcoholic fatty liver disease                                           | 0.986         | 0.239   | 2.68  | 0.52                    | 13.82 |
| Budd-Chiari syndrome                                                        | -             | -       | -     | -                       | -     |
| Acute liver failure                                                         | 1.785         | 0.015   | 5.96  | 1.42                    | 24.97 |
| Cholestatic                                                                 | 0.183         | 0.867   | 1.20  | 0.14                    | 10.28 |
| Autoimmune hepatitis                                                        | 1.566         | 0.061   | 4.79  | .93                     | 24.70 |
| Metabolic liver disease                                                     | 0.630         | 0.565   | 1.88  | 0.22                    | 16.08 |
| Other                                                                       | 2.220         | 0.043   | 9.21  | 1.07                    | 78.94 |
| Prehospitalization                                                          | 0.773         | 0.177   | 2.17  | 0.71                    | 6.64  |
| Fungal colonization at baseline                                             | 1.084         | 0.089   | 2.96  | 0.85                    | 10.29 |
| Pretransplant serum creatinine >2 mg/dl                                     | 0.943         | 0.210   | 2.57  | 0.59                    | 11.24 |
| Early allograft dysfunction                                                 | 0.435         | 0.391   | 1.55  | 0.57                    | 4.18  |
| Primary non-function                                                        | -3.015        | -       | -     | -                       | -     |
| Acute cellular rejection                                                    | 0.967         | 0.199   | 2.63  | 0.60                    | 11.50 |
| Graft-versus-host disease                                                   | 2.040         | 0.007   | 7.69  | 1.76                    | 33.70 |
| Sepsis                                                                      | 3.272         | <0.001  | 26.36 | 9.92                    | 70.08 |
| Bile leak                                                                   | 0.242         | 0.748   | 1.27  | 0.29                    | 5.57  |
| Bile stricture                                                              | 1.971         | 0.009   | 7.18  | 1.64                    | 31.42 |
| Hepatic artery thrombosis                                                   | 0.705         | 0.494   | 2.02  | 0.27                    | 15.26 |
| Hepatic vein thrombosis                                                     | 0.377         | 0.714   | 1.46  | 0.19                    | 10.99 |

|                                                   |        |        |      |      |       |
|---------------------------------------------------|--------|--------|------|------|-------|
| Portal vein thrombosis                            | 1.600  | 0.034  | 4.96 | 1.13 | 21.68 |
| Hemorrhage                                        | 1.750  | <0.001 | 5.76 | 2.22 | 14.93 |
| Piggyback operative technique                     | 1.654  | 0.028  | 5.23 | 1.20 | 22.88 |
| Preservation (static cold storage)                | 0.602  | 0.215  | 1.83 | 0.70 | 4.73  |
| Choledochojejunostomy, primary                    | 1.075  | 0.091  | 2.93 | 0.84 | 10.20 |
| Blood transfusion                                 | 0.314  | 0.188  | 1.37 | 0.86 | 2.18  |
| Massive transfusion (more than 10 units)          | 0.361  | 0.457  | 1.46 | 0.55 | 3.72  |
| Split liver transplantation                       | 0.755  | 0.464  | 2.13 | 0.28 | 16.04 |
| Donor derived infection                           | -      | -      | -    | -    | -     |
| High-urgency transplantation                      | 1.711  | 0.007  | 5.53 | 1.59 | 19.27 |
| Extended criteria donation                        | -0.118 | 0.837  | 0.89 | 0.29 | 2.73  |
| Donation after circulatory determination of death | 0.869  | 0.172  | 2.38 | 0.69 | 8.30  |
| Bile leak                                         | 0.473  | 0.408  | 1.61 | 0.52 | 4.92  |
| Reoperation                                       | 1.266  | 0.013  | 3.55 | 1.31 | 9.59  |
| Early re-transplantation                          | -      | -      | -    | -    | -     |
| Posttransplant dialysis                           | 1.148  | 0.031  | 3.15 | 1.11 | 8.95  |
| CMV viremia                                       | 1.054  | 0.030  | 2.87 | 1.11 | 7.44  |
| <b>Donor related factors</b>                      |        |        |      |      |       |
| Age (years)                                       | 0.016  | 0.325  | 1.02 | 0.99 | 1.05  |
| Sex (male)                                        | 0.252  | 0.604  | 1.29 | 0.50 | 3.33  |
| Height (cm)                                       | -0.035 | 0.182  | 0.97 | 0.92 | 1.02  |
| Weight (kg)                                       | -0.020 | 0.237  | 0.98 | 0.95 | 1.01  |
| Body mass index (kg/m <sup>2</sup> )              | -0.022 | 0.699  | 0.98 | 0.88 | 1.09  |
| HBV positive                                      | -      | -      | -    | -    | -     |
| HCV positive                                      | -      | -      | -    | -    | -     |
| Prolonged hypotensive period                      | -0.486 | 0.445  | 0.62 | 0.18 | 2.14  |
| Hypernatremia (>155 mmol/l)                       | -0.555 | 0.604  | 0.57 | 0.07 | 4.67  |
| Nosocomial infection                              | 0.360  | 0.736  | 1.43 | 0.18 | 11.65 |
| Ventilation duration (days)                       | -0.190 | 0.740  | 0.83 | 0.27 | 2.54  |

Abbreviations: IFI, invasive fungal infections; b-IFI, breakthrough IFI; SAPS III, simplified acute physiology score III; MELD, Model for end-stage liver disease score; CMV, cytomegalovirus; BMI, body mass index; HBV, hepatitis B virus; HCV, hepatitis C virus; HR, hazard ratio.

**Supplementary Table S4.** Risk factors for mortality within 90 days from liver transplantation: multivariate analysis with sepsis ( $n = 214$ )

| Nondependent variable                                                 | B-coefficient | P-value | HR    | 95% confidence interval |        |
|-----------------------------------------------------------------------|---------------|---------|-------|-------------------------|--------|
|                                                                       |               |         |       | lower                   | upper  |
| Underlying disease (reference category: malignancy and other tumours) |               |         |       |                         |        |
| Alcoholic cirrhosis                                                   | -1.828        | 0.161   | 0.16  | 0.01                    | 2.07   |
| Virus related cirrhosis                                               | -             | -       | -     | -                       | -      |
| Nonalcoholic steatohepatitis                                          | 1.646         | 0.106   | 5.18  | 0.71                    | 38.09  |
| Budd-Chiari syndrome                                                  | -             | -       | -     | -                       | -      |
| Acute liver failure                                                   | 0.522         | 0.633   | 1.69  | 0.19                    | 14.37  |
| Cholestatic disease                                                   | 0.578         | 0.623   | 1.78  | 0.18                    | 17.88  |
| Autoimmune cirrhosis                                                  | 1.039         | 0.302   | 2.83  | 0.39                    | 20.36  |
| Metabolic disease                                                     | 1.453         | 0.219   | 4.28  | 0.42                    | 43.33  |
| Other                                                                 | -2.182        | 0.194   | 0.11  | 0.01                    | 3.04   |
| Sepsis                                                                | 3.844         | <0.001  | 46.71 | 7.86                    | 277.65 |
| Roux-Y-choledochojejunostomy                                          | 0.381         | 0.460   | 1.46  | 0.53                    | 4.02   |
| Piggyback anastomosis                                                 | 2.296         | 0.078   | 9.93  | 0.78                    | 127.12 |
| Relaparotomy                                                          | 0.053         | 0.941   | 1.05  | 0.26                    | 4.29   |
| Postoperative dialysis                                                | -0.431        | 0.579   | 0.65  | 0.14                    | 2.98   |
| CMV viremia                                                           | -0.008        | 0.991   | 0.99  | 0.25                    | 4.00   |
| Graft-versus-host disease                                             | 3.268         | 0.026   | 26.25 | 1.48                    | 466.70 |
| Bile stricture                                                        | -0.756        | 0.465   | 0.47  | 0.06                    | 3.58   |
| Portal vein thrombosis                                                | -0.784        | 0.554   | 0.46  | 0.03                    | 6.11   |

Variables excluded from model (multicollinearity): hemorrhage, high-urgency, breakthrough IFI, fungal colonization at baseline, and IFI. Abbreviations: IFI, invasive fungal infections; HR, hazard ratio.
